# Supplementary material for: Feasibility, reliability and validity of smartphone administered cognitive ecological momentary assessments in breast cancer survivors
Source: Front Digit Health. 2025 Apr 22;7:1543846. doi: 10.3389/fdgth.2025.1543846 (PMC12052553; doi:10.3389/fdgth.2025.1543846)
Supplement: Supplementary file 2 [file Table4.xlsx]

## Sheet: Supplementary Table 4
Supplementary Table 4. Pearson r correlations (95% CI)
	Age	Education	N-back	Color Trick RT	Matching Pair	Memory Matrix	Memory List 12	Memory List 18	Copykat	Hand Swype RT	Hand Swype Score	Quick Tap 1 RT	CRCI Symptoms (EMA)	Cognitive Abilities (EMA)	Trails A Time	Trails B Time	Stroop RT	Digit Symbol #Correct/Second	Digit Symbol Time	Immediate Recall	Delayed Recall	Raw Combined Score	FACT-Cog PCI
Age	1 (1, 1)	-0.05 (-0.25, 0.14)	-0.17 (-0.35, 0.03)	0.52 (0.36, 0.65)	-0.42 (-0.57, -0.24)	-0.55 (-0.68, -0.4)	-0.16 (-0.34, 0.04)	-0.12 (-0.31, 0.08)	-0.28 (-0.46, -0.09)	0.38 (0.2, 0.54)	-0.39 (-0.55, -0.21)	0.37 (0.19, 0.53)	-0.28 (-0.46, -0.09)	0.3 (0.11, 0.47)	0.2 (0, 0.38)	0.21 (0.01, 0.39)	0.42 (0.24, 0.57)	-0.51 (-0.65, -0.35)	0.25 (0.05, 0.42)	-0.14 (-0.33, 0.05)	-0.2 (-0.38, -0.01)	-0.49 (-0.62, -0.32)	0.32 (0.14, 0.49)
Education	-0.05 (-0.25, 0.14)	1 (1, 1)	0.23 (0.04, 0.41)	-0.1 (-0.29, 0.1)	-0.01 (-0.2, 0.19)	0.05 (-0.15, 0.24)	0.14 (-0.06, 0.32)	0.18 (-0.02, 0.36)	0.11 (-0.09, 0.3)	0.05 (-0.14, 0.25)	0.05 (-0.15, 0.24)	-0.07 (-0.26, 0.13)	-0.05 (-0.25, 0.15)	0.15 (-0.04, 0.34)	-0.25 (-0.42, -0.05)	-0.24 (-0.41, -0.04)	-0.19 (-0.37, 0.01)	0.06 (-0.13, 0.26)	-0.02 (-0.22, 0.18)	0.23 (0.03, 0.41)	0.19 (0, 0.38)	0.24 (0.05, 0.42)	0.08 (-0.11, 0.28)
N-back	-0.17 (-0.35, 0.03)	0.23 (0.04, 0.41)	1 (1, 1)	-0.42 (-0.57, -0.24)	0.5 (0.34, 0.64)	0.51 (0.35, 0.64)	0.3 (0.11, 0.47)	0.24 (0.05, 0.42)	0.5 (0.34, 0.64)	-0.18 (-0.36, 0.02)	0.37 (0.19, 0.53)	-0.25 (-0.42, -0.05)	-0.06 (-0.25, 0.14)	-0.03 (-0.22, 0.17)	-0.42 (-0.57, -0.25)	-0.61 (-0.72, -0.47)	-0.33 (-0.49, -0.14)	0.41 (0.23, 0.56)	-0.27 (-0.45, -0.08)	0.31 (0.12, 0.48)	0.28 (0.09, 0.45)	0.53 (0.38, 0.66)	-0.04 (-0.23, 0.16)
Color Trick RT	0.52 (0.36, 0.65)	-0.1 (-0.29, 0.1)	-0.42 (-0.57, -0.24)	1 (1, 1)	-0.52 (-0.65, -0.36)	-0.46 (-0.6, -0.29)	-0.14 (-0.33, 0.05)	-0.2 (-0.39, -0.01)	-0.42 (-0.57, -0.25)	0.53 (0.38, 0.66)	-0.5 (-0.63, -0.34)	0.38 (0.2, 0.54)	-0.22 (-0.4, -0.03)	0.17 (-0.03, 0.35)	0.39 (0.21, 0.54)	0.46 (0.29, 0.6)	0.55 (0.39, 0.67)	-0.54 (-0.67, -0.39)	0.24 (0.05, 0.42)	-0.35 (-0.51, -0.16)	-0.14 (-0.33, 0.06)	-0.61 (-0.72, -0.47)	0.15 (-0.05, 0.33)
Matching Pair	-0.42 (-0.57, -0.24)	-0.01 (-0.2, 0.19)	0.5 (0.34, 0.64)	-0.52 (-0.65, -0.36)	1 (1, 1)	0.71 (0.6, 0.8)	0.33 (0.14, 0.49)	0.28 (0.09, 0.46)	0.48 (0.31, 0.61)	-0.37 (-0.53, -0.19)	0.46 (0.29, 0.6)	-0.51 (-0.65, -0.35)	0.03 (-0.17, 0.22)	-0.13 (-0.32, 0.07)	-0.28 (-0.45, -0.09)	-0.39 (-0.55, -0.21)	-0.38 (-0.54, -0.2)	0.52 (0.36, 0.65)	-0.25 (-0.43, -0.06)	0.33 (0.15, 0.5)	0.32 (0.13, 0.49)	0.58 (0.44, 0.7)	-0.13 (-0.31, 0.07)
Memory Matrix	-0.55 (-0.68, -0.4)	0.05 (-0.15, 0.24)	0.51 (0.35, 0.64)	-0.46 (-0.6, -0.29)	0.71 (0.6, 0.8)	1 (1, 1)	0.29 (0.09, 0.46)	0.29 (0.1, 0.46)	0.48 (0.31, 0.62)	-0.32 (-0.48, -0.13)	0.48 (0.32, 0.62)	-0.46 (-0.6, -0.29)	-0.03 (-0.22, 0.17)	-0.14 (-0.33, 0.06)	-0.35 (-0.51, -0.16)	-0.44 (-0.58, -0.26)	-0.38 (-0.53, -0.19)	0.52 (0.36, 0.65)	-0.24 (-0.42, -0.04)	0.35 (0.17, 0.51)	0.32 (0.13, 0.48)	0.6 (0.46, 0.71)	-0.05 (-0.24, 0.15)
Memory List 12	-0.16 (-0.34, 0.04)	0.14 (-0.06, 0.32)	0.3 (0.11, 0.47)	-0.14 (-0.33, 0.05)	0.33 (0.14, 0.49)	0.29 (0.09, 0.46)	1 (1, 1)	0.79 (0.71, 0.86)	0.39 (0.21, 0.54)	-0.1 (-0.29, 0.1)	0.2 (0.01, 0.38)	-0.32 (-0.49, -0.13)	-0.2 (-0.38, -0.01)	0.11 (-0.08, 0.3)	-0.09 (-0.29, 0.1)	-0.18 (-0.37, 0.01)	-0.09 (-0.28, 0.1)	0.07 (-0.13, 0.26)	0.01 (-0.19, 0.2)	0.33 (0.14, 0.49)	0.37 (0.19, 0.53)	0.26 (0.07, 0.43)	0.17 (-0.03, 0.35)
Memory List 18	-0.12 (-0.31, 0.08)	0.18 (-0.02, 0.36)	0.24 (0.05, 0.42)	-0.2 (-0.39, -0.01)	0.28 (0.09, 0.46)	0.29 (0.1, 0.46)	0.79 (0.71, 0.86)	1 (1, 1)	0.37 (0.18, 0.52)	-0.12 (-0.31, 0.08)	0.19 (-0.01, 0.37)	-0.29 (-0.46, -0.1)	-0.31 (-0.47, -0.12)	0.15 (-0.05, 0.33)	-0.11 (-0.3, 0.09)	-0.23 (-0.41, -0.03)	-0.1 (-0.29, 0.1)	0.08 (-0.12, 0.27)	-0.02 (-0.21, 0.18)	0.42 (0.24, 0.57)	0.38 (0.2, 0.54)	0.29 (0.1, 0.46)	0.21 (0.01, 0.39)
Copykat	-0.28 (-0.46, -0.09)	0.11 (-0.09, 0.3)	0.5 (0.34, 0.64)	-0.42 (-0.57, -0.25)	0.48 (0.31, 0.61)	0.48 (0.31, 0.62)	0.39 (0.21, 0.54)	0.37 (0.18, 0.52)	1 (1, 1)	-0.25 (-0.42, -0.05)	0.4 (0.22, 0.55)	-0.32 (-0.49, -0.13)	-0.02 (-0.22, 0.17)	-0.16 (-0.35, 0.04)	-0.29 (-0.46, -0.1)	-0.38 (-0.54, -0.2)	-0.34 (-0.51, -0.16)	0.32 (0.13, 0.48)	-0.08 (-0.27, 0.12)	0.42 (0.24, 0.57)	0.33 (0.14, 0.49)	0.49 (0.33, 0.63)	0 (-0.2, 0.19)
Hand Swype RT	0.38 (0.2, 0.54)	0.05 (-0.14, 0.25)	-0.18 (-0.36, 0.02)	0.53 (0.38, 0.66)	-0.37 (-0.53, -0.19)	-0.32 (-0.48, -0.13)	-0.1 (-0.29, 0.1)	-0.12 (-0.31, 0.08)	-0.25 (-0.42, -0.05)	1 (1, 1)	-0.75 (-0.82, -0.64)	0.39 (0.21, 0.55)	-0.22 (-0.4, -0.03)	0.13 (-0.07, 0.31)	0.2 (0.01, 0.38)	0.27 (0.08, 0.44)	0.33 (0.14, 0.49)	-0.38 (-0.53, -0.2)	0.19 (0, 0.37)	-0.27 (-0.44, -0.08)	-0.09 (-0.28, 0.11)	-0.4 (-0.55, -0.22)	0.1 (-0.1, 0.29)
Hand Swype Score	-0.39 (-0.55, -0.21)	0.05 (-0.15, 0.24)	0.37 (0.19, 0.53)	-0.5 (-0.63, -0.34)	0.46 (0.29, 0.6)	0.48 (0.32, 0.62)	0.2 (0.01, 0.38)	0.19 (-0.01, 0.37)	0.4 (0.22, 0.55)	-0.75 (-0.82, -0.64)	1 (1, 1)	-0.48 (-0.62, -0.32)	0.1 (-0.1, 0.29)	-0.1 (-0.29, 0.1)	-0.17 (-0.35, 0.03)	-0.3 (-0.47, -0.11)	-0.32 (-0.49, -0.13)	0.44 (0.27, 0.59)	-0.24 (-0.42, -0.05)	0.28 (0.09, 0.45)	0.17 (-0.02, 0.36)	0.45 (0.28, 0.59)	-0.03 (-0.22, 0.17)
Quick Tap 1 RT	0.37 (0.19, 0.53)	-0.07 (-0.26, 0.13)	-0.25 (-0.42, -0.05)	0.38 (0.2, 0.54)	-0.51 (-0.65, -0.35)	-0.46 (-0.6, -0.29)	-0.32 (-0.49, -0.13)	-0.29 (-0.46, -0.1)	-0.32 (-0.49, -0.13)	0.39 (0.21, 0.55)	-0.48 (-0.62, -0.32)	1 (1, 1)	0.02 (-0.18, 0.21)	-0.01 (-0.2, 0.19)	0.13 (-0.07, 0.31)	0.29 (0.1, 0.46)	0.28 (0.09, 0.45)	-0.35 (-0.51, -0.17)	0.17 (-0.03, 0.35)	-0.33 (-0.5, -0.14)	-0.25 (-0.42, -0.05)	-0.41 (-0.56, -0.24)	-0.06 (-0.25, 0.14)
CRCI Symptoms (EMA)	-0.28 (-0.46, -0.09)	-0.05 (-0.25, 0.15)	-0.06 (-0.25, 0.14)	-0.22 (-0.4, -0.03)	0.03 (-0.17, 0.22)	-0.03 (-0.22, 0.17)	-0.2 (-0.38, -0.01)	-0.31 (-0.47, -0.12)	-0.02 (-0.22, 0.17)	-0.22 (-0.4, -0.03)	0.1 (-0.1, 0.29)	0.02 (-0.18, 0.21)	1 (1, 1)	-0.64 (-0.74, -0.5)	-0.02 (-0.22, 0.18)	-0.06 (-0.25, 0.14)	-0.25 (-0.43, -0.06)	0.25 (0.06, 0.43)	-0.12 (-0.31, 0.08)	-0.08 (-0.27, 0.12)	-0.18 (-0.37, 0.01)	0.11 (-0.08, 0.3)	-0.66 (-0.76, -0.53)
Cognitive Abilities (EMA)	0.3 (0.11, 0.47)	0.15 (-0.04, 0.34)	-0.03 (-0.22, 0.17)	0.17 (-0.03, 0.35)	-0.13 (-0.32, 0.07)	-0.14 (-0.33, 0.06)	0.11 (-0.08, 0.3)	0.15 (-0.05, 0.33)	-0.16 (-0.35, 0.04)	0.13 (-0.07, 0.31)	-0.1 (-0.29, 0.1)	-0.01 (-0.2, 0.19)	-0.64 (-0.74, -0.5)	1 (1, 1)	-0.04 (-0.23, 0.16)	0.02 (-0.17, 0.22)	0.16 (-0.04, 0.34)	-0.2 (-0.38, 0)	0.14 (-0.06, 0.32)	0.15 (-0.05, 0.34)	0.05 (-0.15, 0.24)	-0.07 (-0.27, 0.13)	0.64 (0.5, 0.74)
Trails A Time	0.2 (0, 0.38)	-0.25 (-0.42, -0.05)	-0.42 (-0.57, -0.25)	0.39 (0.21, 0.54)	-0.28 (-0.45, -0.09)	-0.35 (-0.51, -0.16)	-0.09 (-0.29, 0.1)	-0.11 (-0.3, 0.09)	-0.29 (-0.46, -0.1)	0.2 (0.01, 0.38)	-0.17 (-0.35, 0.03)	0.13 (-0.07, 0.31)	-0.02 (-0.22, 0.18)	-0.04 (-0.23, 0.16)	1 (1, 1)	0.65 (0.52, 0.75)	0.62 (0.48, 0.72)	-0.44 (-0.58, -0.26)	0.12 (-0.08, 0.31)	-0.28 (-0.45, -0.09)	-0.14 (-0.33, 0.06)	-0.71 (-0.79, -0.59)	-0.08 (-0.27, 0.12)
Trails B Time	0.21 (0.01, 0.39)	-0.24 (-0.41, -0.04)	-0.61 (-0.72, -0.47)	0.46 (0.29, 0.6)	-0.39 (-0.55, -0.21)	-0.44 (-0.58, -0.26)	-0.18 (-0.37, 0.01)	-0.23 (-0.41, -0.03)	-0.38 (-0.54, -0.2)	0.27 (0.08, 0.44)	-0.3 (-0.47, -0.11)	0.29 (0.1, 0.46)	-0.06 (-0.25, 0.14)	0.02 (-0.17, 0.22)	0.65 (0.52, 0.75)	1 (1, 1)	0.57 (0.43, 0.69)	-0.44 (-0.58, -0.26)	0.08 (-0.12, 0.27)	-0.41 (-0.56, -0.23)	-0.23 (-0.41, -0.03)	-0.66 (-0.76, -0.54)	0 (-0.2, 0.2)
Stroop RT	0.42 (0.24, 0.57)	-0.19 (-0.37, 0.01)	-0.33 (-0.49, -0.14)	0.55 (0.39, 0.67)	-0.38 (-0.54, -0.2)	-0.38 (-0.53, -0.19)	-0.09 (-0.28, 0.1)	-0.1 (-0.29, 0.1)	-0.34 (-0.51, -0.16)	0.33 (0.14, 0.49)	-0.32 (-0.49, -0.13)	0.28 (0.09, 0.45)	-0.25 (-0.43, -0.06)	0.16 (-0.04, 0.34)	0.62 (0.48, 0.72)	0.57 (0.43, 0.69)	1 (1, 1)	-0.64 (-0.74, -0.51)	0.13 (-0.07, 0.32)	-0.13 (-0.32, 0.06)	-0.1 (-0.29, 0.1)	-0.74 (-0.82, -0.64)	0.12 (-0.08, 0.31)
Digit Symbol #Correct/Second	-0.51 (-0.65, -0.35)	0.06 (-0.13, 0.26)	0.41 (0.23, 0.56)	-0.54 (-0.67, -0.39)	0.52 (0.36, 0.65)	0.52 (0.36, 0.65)	0.07 (-0.13, 0.26)	0.08 (-0.12, 0.27)	0.32 (0.13, 0.48)	-0.38 (-0.53, -0.2)	0.44 (0.27, 0.59)	-0.35 (-0.51, -0.17)	0.25 (0.06, 0.43)	-0.2 (-0.38, 0)	-0.44 (-0.58, -0.26)	-0.44 (-0.58, -0.26)	-0.64 (-0.74, -0.51)	1 (1, 1)	-0.64 (-0.74, -0.51)	0.15 (-0.05, 0.34)	0.02 (-0.18, 0.22)	0.79 (0.7, 0.85)	-0.22 (-0.4, -0.02)
Digit Symbol Time	0.25 (0.05, 0.42)	-0.02 (-0.22, 0.18)	-0.27 (-0.45, -0.08)	0.24 (0.05, 0.42)	-0.25 (-0.43, -0.06)	-0.24 (-0.42, -0.04)	0.01 (-0.19, 0.2)	-0.02 (-0.21, 0.18)	-0.08 (-0.27, 0.12)	0.19 (0, 0.37)	-0.24 (-0.42, -0.05)	0.17 (-0.03, 0.35)	-0.12 (-0.31, 0.08)	0.14 (-0.06, 0.32)	0.12 (-0.08, 0.31)	0.08 (-0.12, 0.27)	0.13 (-0.07, 0.32)	-0.64 (-0.74, -0.51)	1 (1, 1)	-0.01 (-0.21, 0.18)	0.1 (-0.1, 0.29)	-0.36 (-0.52, -0.17)	0.11 (-0.09, 0.3)
Immediate Recall	-0.14 (-0.33, 0.05)	0.23 (0.03, 0.41)	0.31 (0.12, 0.48)	-0.35 (-0.51, -0.16)	0.33 (0.15, 0.5)	0.35 (0.17, 0.51)	0.33 (0.14, 0.49)	0.42 (0.24, 0.57)	0.42 (0.24, 0.57)	-0.27 (-0.44, -0.08)	0.28 (0.09, 0.45)	-0.33 (-0.5, -0.14)	-0.08 (-0.27, 0.12)	0.15 (-0.05, 0.34)	-0.28 (-0.45, -0.09)	-0.41 (-0.56, -0.23)	-0.13 (-0.32, 0.06)	0.15 (-0.05, 0.34)	-0.01 (-0.21, 0.18)	1 (1, 1)	0.55 (0.4, 0.67)	0.56 (0.41, 0.68)	0.11 (-0.08, 0.3)
Delayed Recall	-0.2 (-0.38, -0.01)	0.19 (0, 0.38)	0.28 (0.09, 0.45)	-0.14 (-0.33, 0.06)	0.32 (0.13, 0.49)	0.32 (0.13, 0.48)	0.37 (0.19, 0.53)	0.38 (0.2, 0.54)	0.33 (0.14, 0.49)	-0.09 (-0.28, 0.11)	0.17 (-0.02, 0.36)	-0.25 (-0.42, -0.05)	-0.18 (-0.37, 0.01)	0.05 (-0.15, 0.24)	-0.14 (-0.33, 0.06)	-0.23 (-0.41, -0.03)	-0.1 (-0.29, 0.1)	0.02 (-0.18, 0.22)	0.1 (-0.1, 0.29)	0.55 (0.4, 0.67)	1 (1, 1)	0.48 (0.31, 0.62)	0.12 (-0.07, 0.31)
Raw Combined Score	-0.49 (-0.62, -0.32)	0.24 (0.05, 0.42)	0.53 (0.38, 0.66)	-0.61 (-0.72, -0.47)	0.58 (0.44, 0.7)	0.6 (0.46, 0.71)	0.26 (0.07, 0.43)	0.29 (0.1, 0.46)	0.49 (0.33, 0.63)	-0.4 (-0.55, -0.22)	0.45 (0.28, 0.59)	-0.41 (-0.56, -0.24)	0.11 (-0.08, 0.3)	-0.07 (-0.27, 0.13)	-0.71 (-0.79, -0.59)	-0.66 (-0.76, -0.54)	-0.74 (-0.82, -0.64)	0.79 (0.7, 0.85)	-0.36 (-0.52, -0.17)	0.56 (0.41, 0.68)	0.48 (0.31, 0.62)	1 (1, 1)	-0.05 (-0.25, 0.15)
FACT-Cog PCI	0.32 (0.14, 0.49)	0.08 (-0.11, 0.28)	-0.04 (-0.23, 0.16)	0.15 (-0.05, 0.33)	-0.13 (-0.31, 0.07)	-0.05 (-0.24, 0.15)	0.17 (-0.03, 0.35)	0.21 (0.01, 0.39)	0 (-0.2, 0.19)	0.1 (-0.1, 0.29)	-0.03 (-0.22, 0.17)	-0.06 (-0.25, 0.14)	-0.66 (-0.76, -0.53)	0.64 (0.5, 0.74)	-0.08 (-0.27, 0.12)	0 (-0.2, 0.2)	0.12 (-0.08, 0.31)	-0.22 (-0.4, -0.02)	0.11 (-0.09, 0.3)	0.11 (-0.08, 0.3)	0.12 (-0.07, 0.31)	-0.05 (-0.25, 0.15)	1 (1, 1)
